# Supplementary figures and images for: Facile deposition of [60]fullerene on the electrode by electrochemical oxidative polymerization of thiopheneElectronic supplementary information (ESI) available: SEM images and action spectrum. See http://www.rsc.org/suppdata/cc/b2/b210433d/
Source: Royal Society of Chemistry journal article supplement (doi:10.1039/b210433d), 2003-01-08

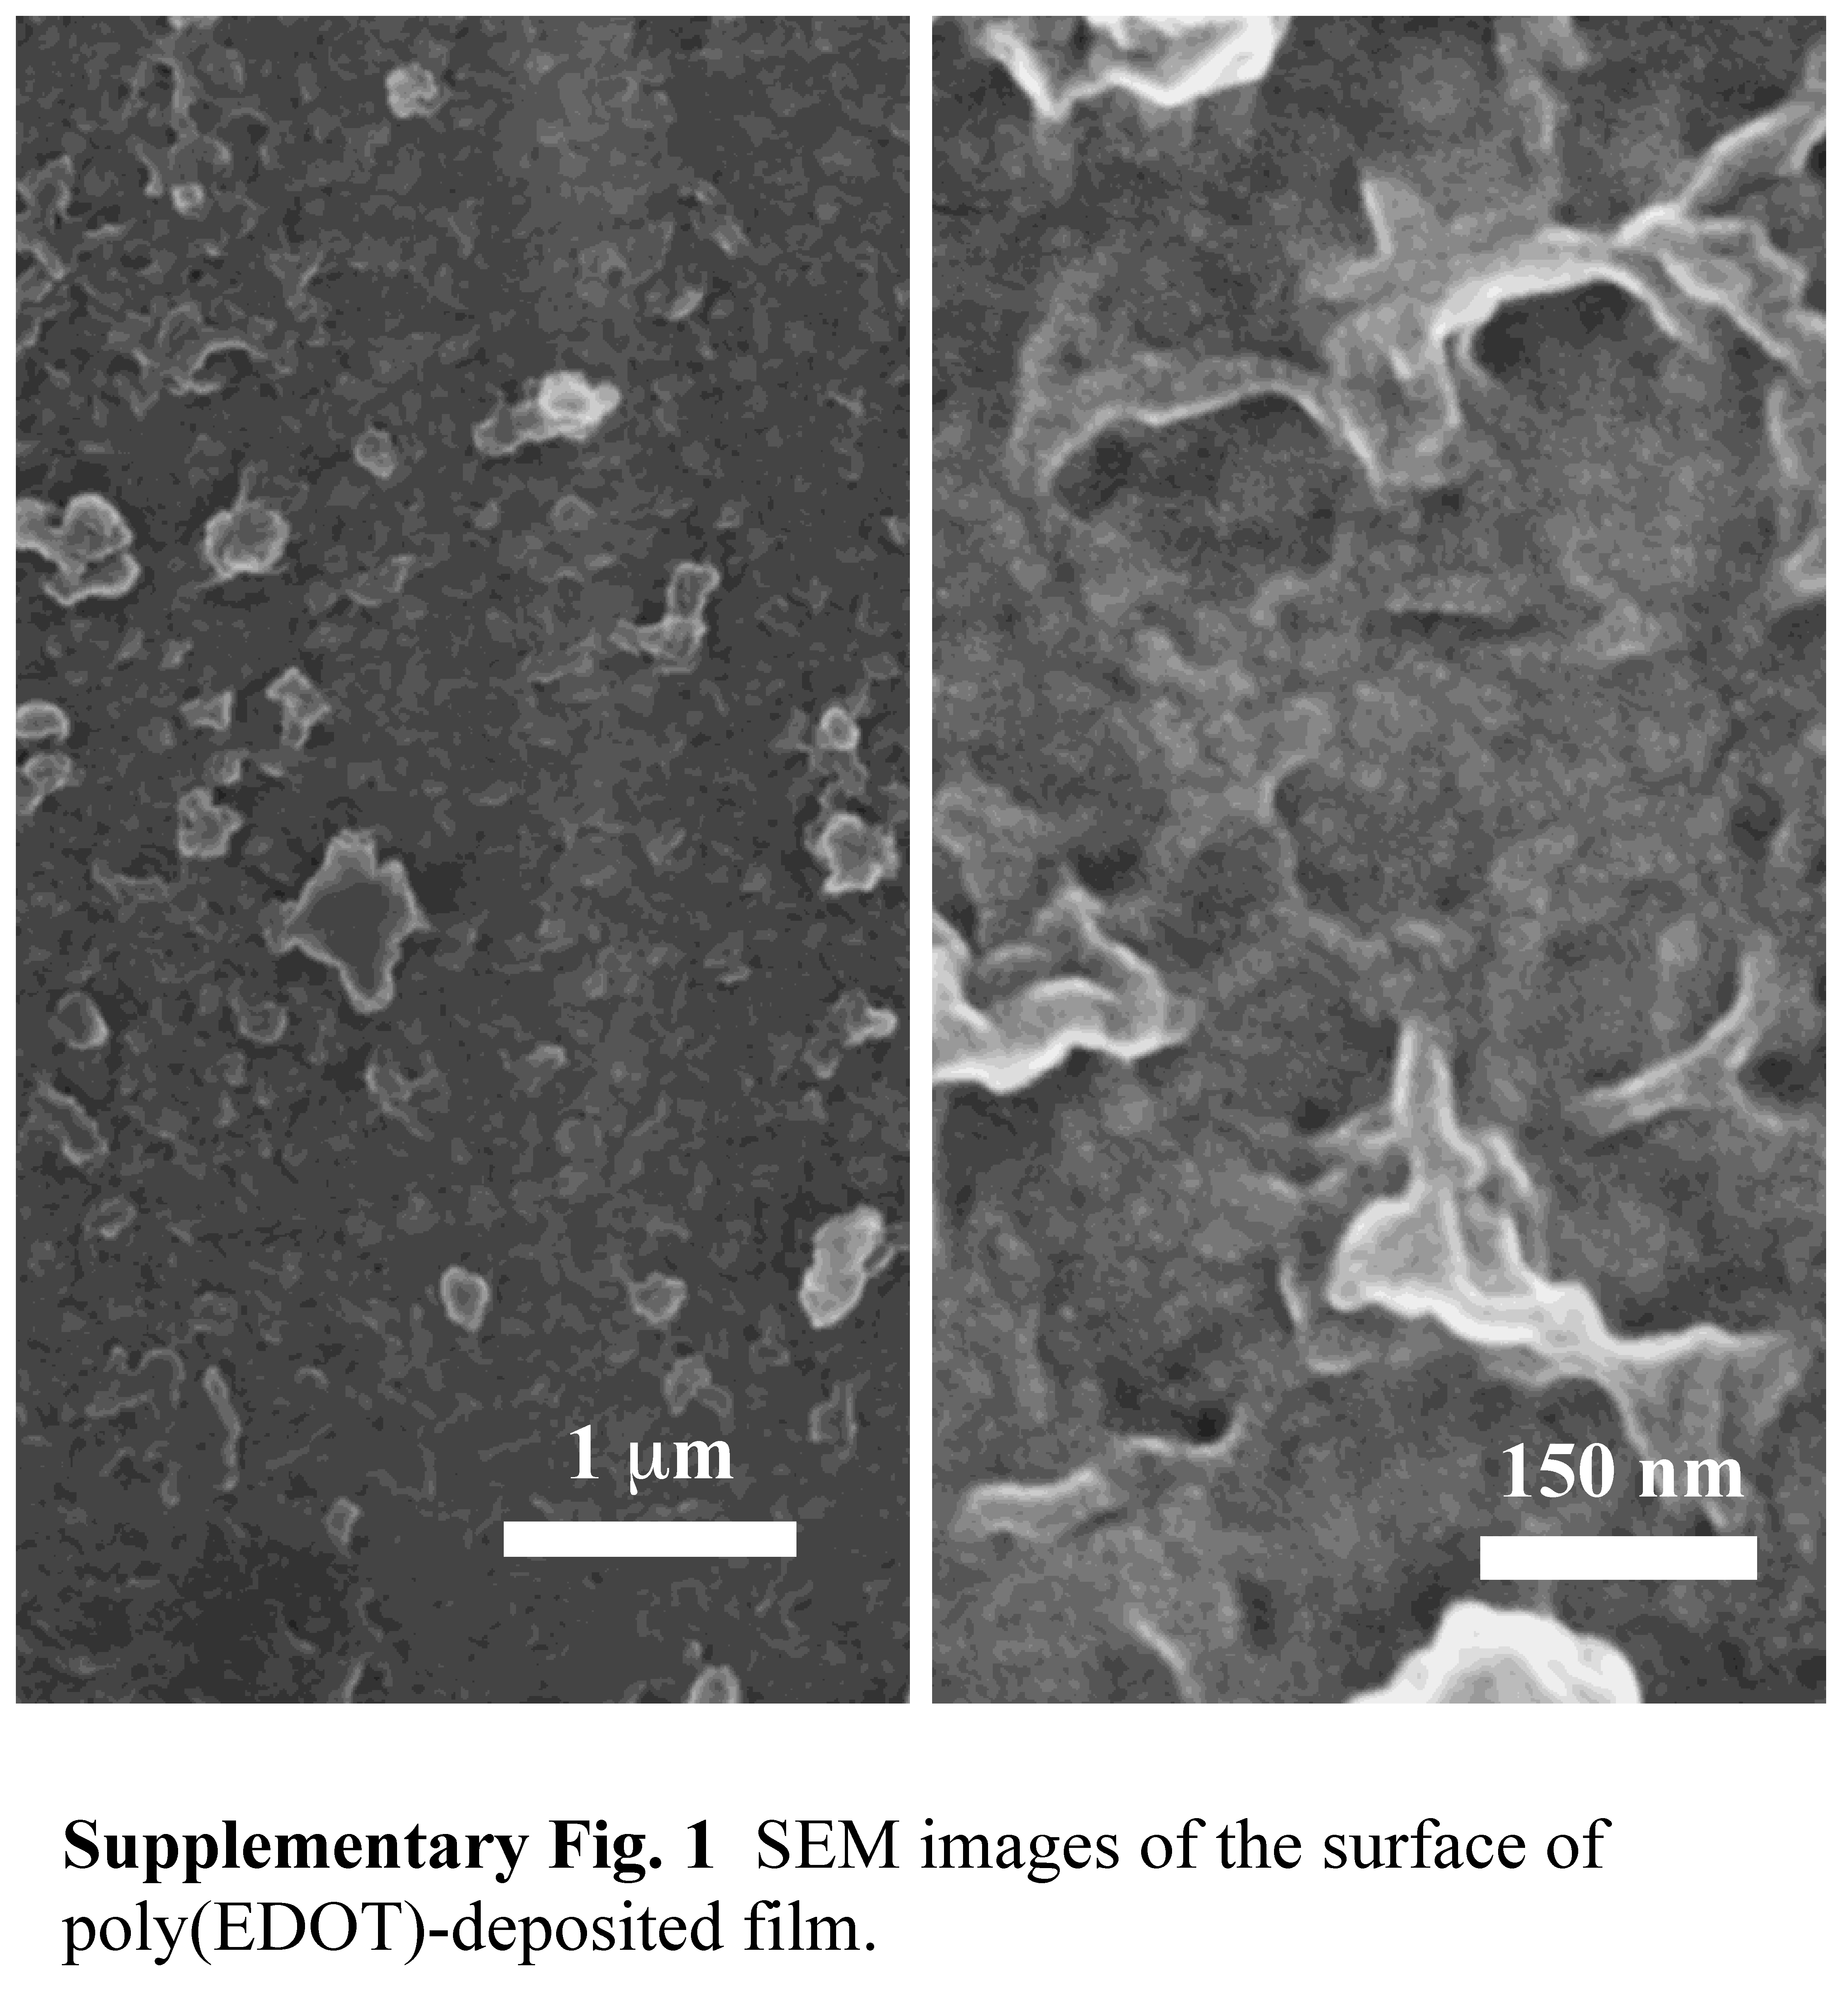


**Supplementary Fig. 1**: poly(EDOT) surface prepared in the absence of the complex.


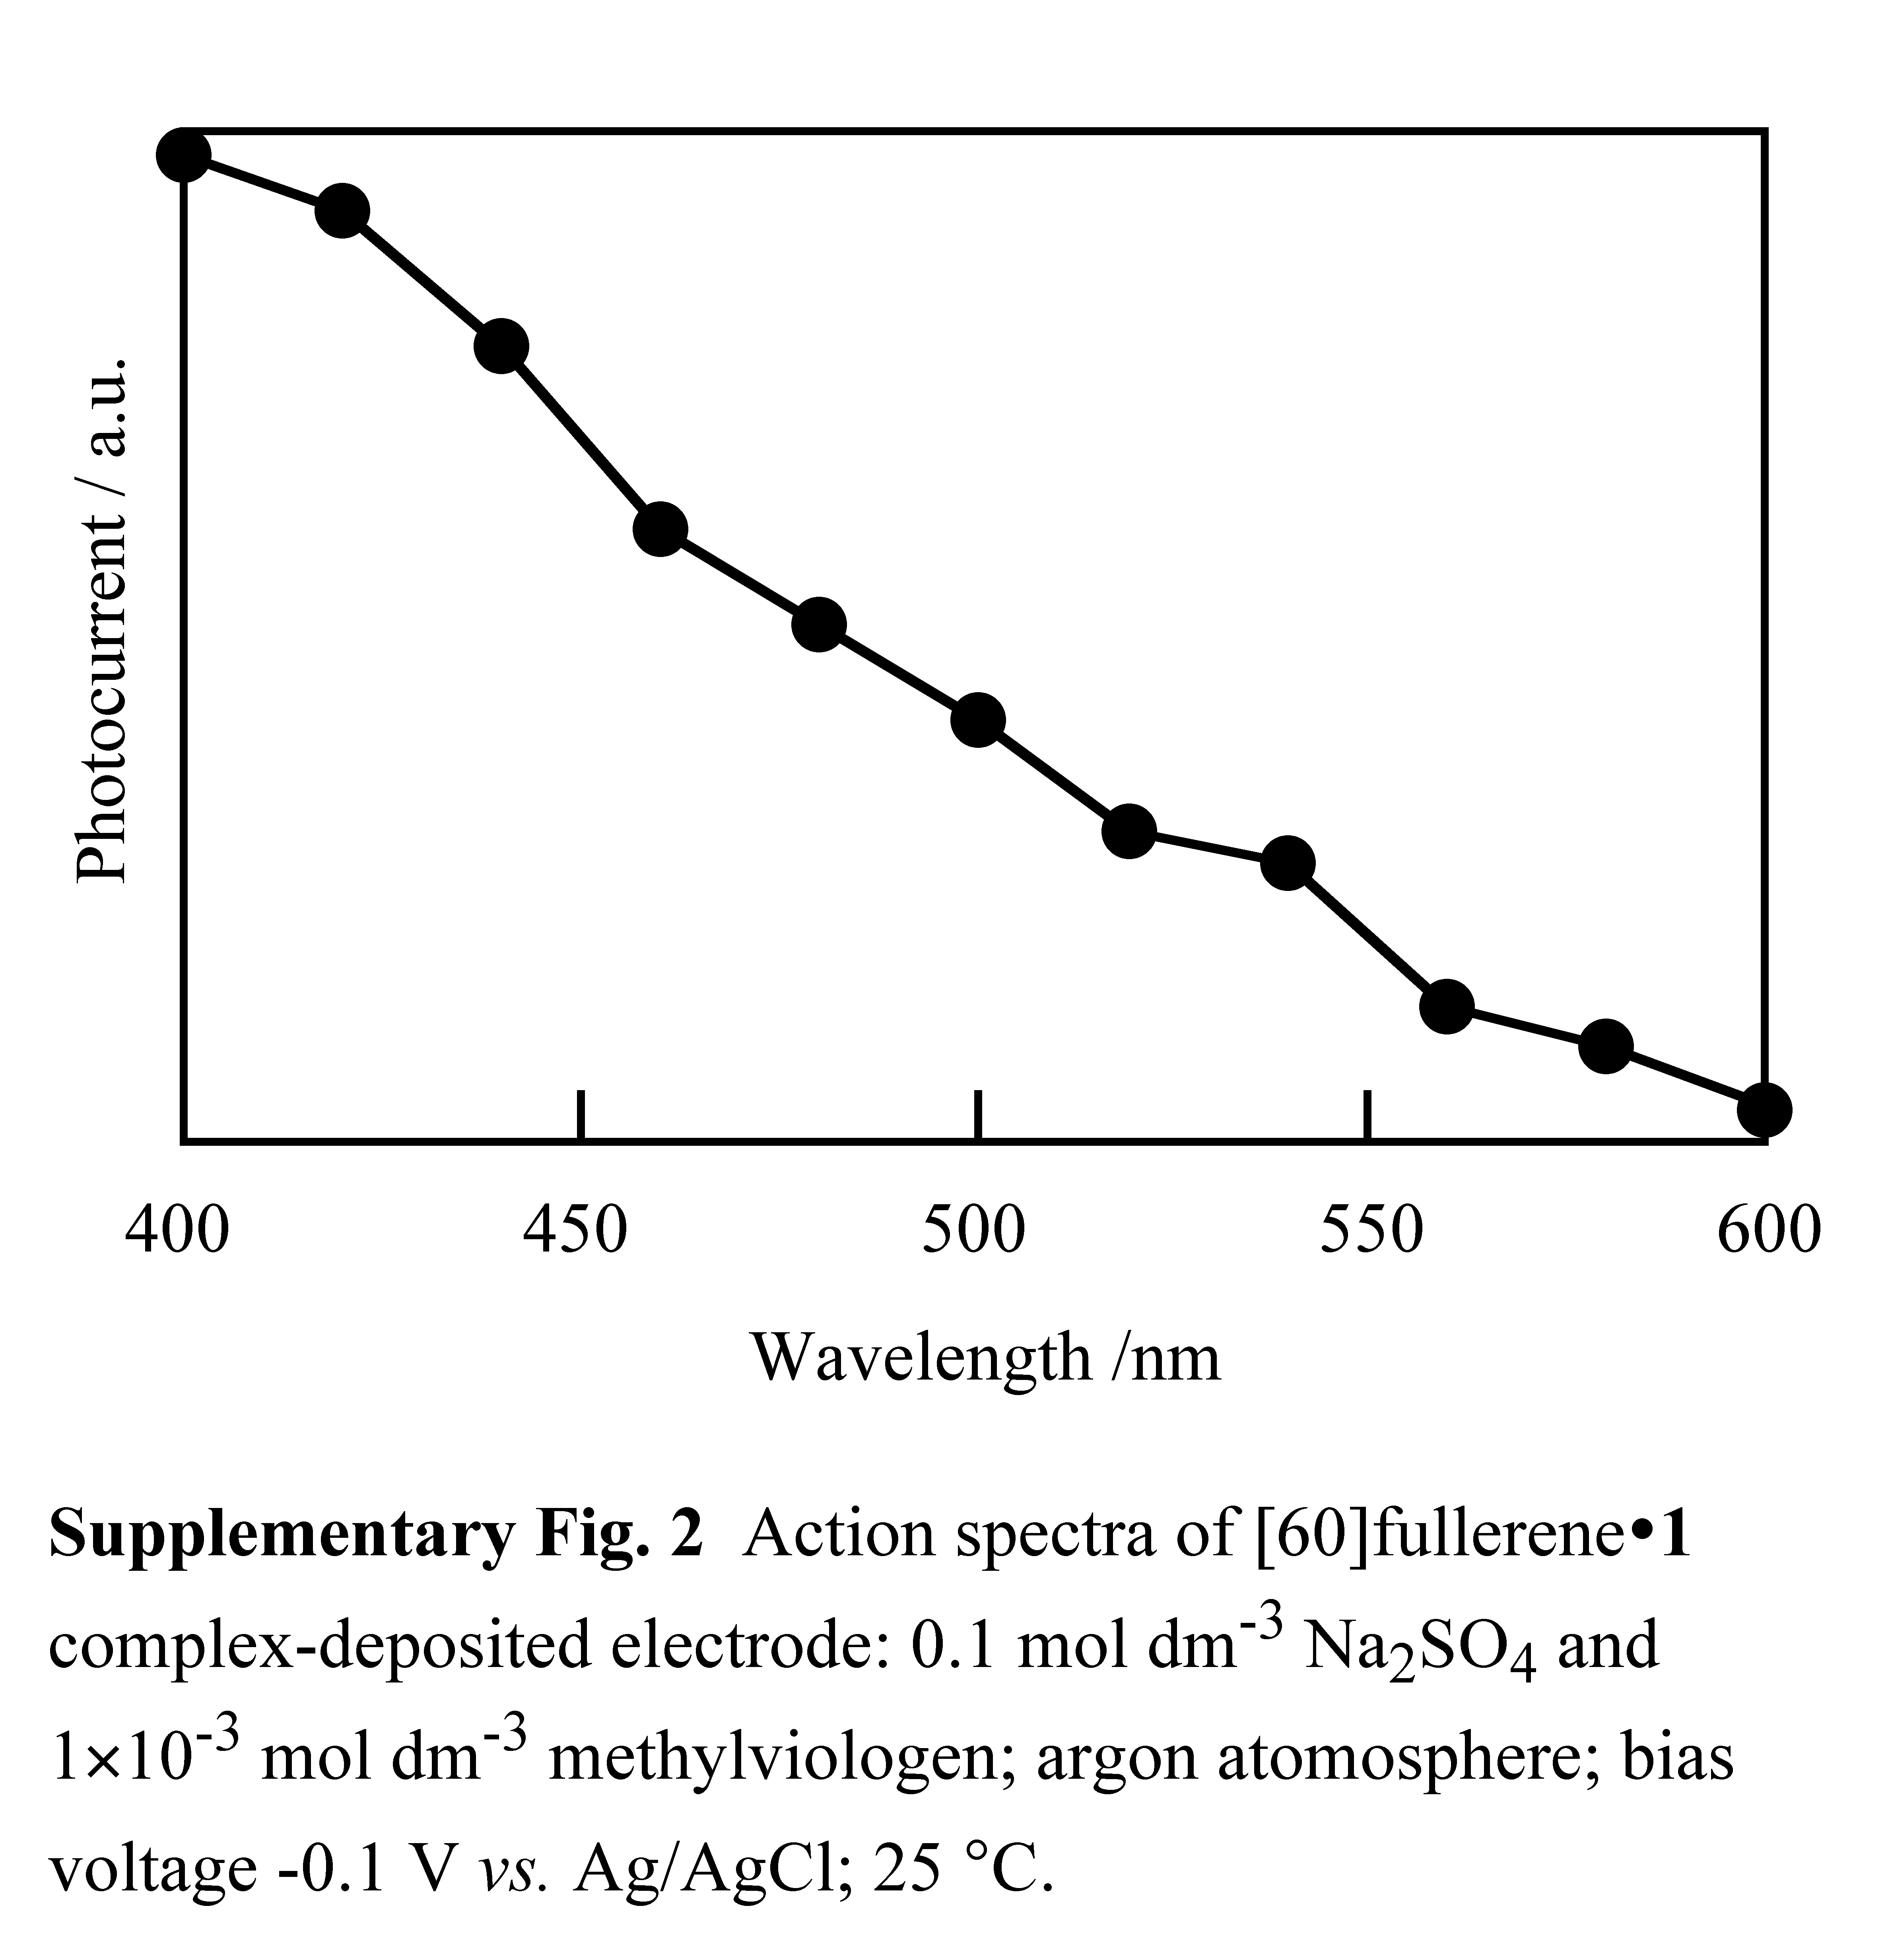

Supplement: b210433d.doc [file b210433d.doc]
